# Supplementary material
Source: Springer Nature journal article supplement (https://www.springermedizin.de/resource/supplementary/13550_2013_136_MOESM3_ESM.pdf/9687664)

Diabetic

Non-diabetic

L leg

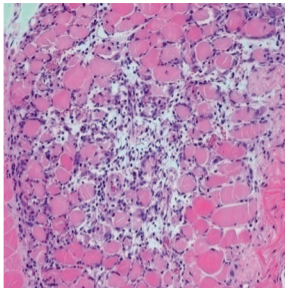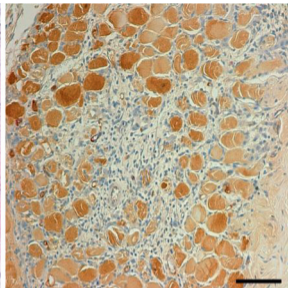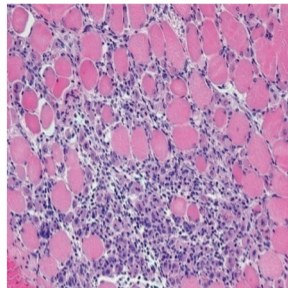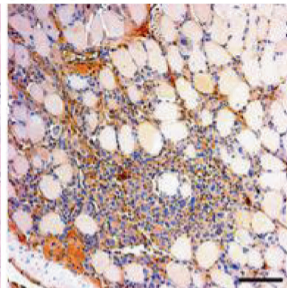

R leg

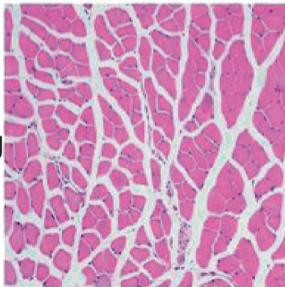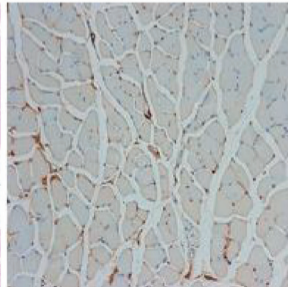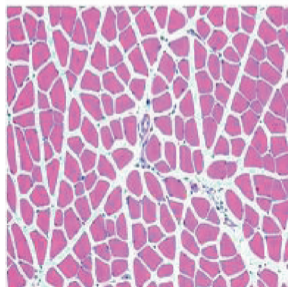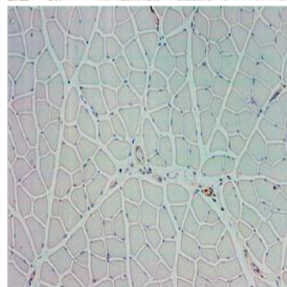

Supplement: MOESM3 [file 9687664]
